# Supplementary material for: Impact of Treatment Beliefs and Social Network Encouragement on Initiation of Care by VA Service Users With PTSD
Source: Atypon-hosted journal article supplement (doi:10.1176/appi.ps.201200324), 2014-02-03
Supplement: 654_ds001.pdf [file 654_ds001.pdf]

Table 5. Belief scale items

|                                                                     | Mean $\pm$ SD  | Minimum | Maximum |
|---------------------------------------------------------------------|----------------|---------|---------|
| <b>Negative illness identity</b>                                    |                |         |         |
| <b>-Negative self-assessments of PTSD diagnosis . . .</b>           |                |         |         |
| I feel out of place in the world because of PTSD                    | 2.77 $\pm$ .81 | 1       | 4       |
| People think less of me because of PTSD                             | 2.31 $\pm$ .86 | 1       | 4       |
| I am embarrassed or ashamed that I have PTSD                        | 2.59 $\pm$ .89 | 1       | 4       |
| I am disappointed in myself for having PTSD                         | 2.57 $\pm$ .90 | 1       | 4       |
| I feel weak compared to Veterans who do not have PTSD               | 2.46 $\pm$ .90 | 1       | 4       |
| <b>Beliefs about antidepressants</b>                                |                |         |         |
| <b>-Antidepressants . . .</b>                                       |                |         |         |
| Are effective in treating PTSD/ emotional problems                  | 2.68 $\pm$ .68 | 1       | 4       |
| Do not fix problems/cover them up (R)                               | 2.27 $\pm$ .74 | 1       | 4       |
| Make people feel drugged (R)                                        | 2.28 $\pm$ .72 | 1       | 4       |
| Can help people get back to normal                                  | 2.62 $\pm$ .66 | 1       | 4       |
| Are addictive (R)                                                   | 2.32 $\pm$ .71 | 1       | 4       |
| <b>Beliefs about psychotherapy</b>                                  |                |         |         |
| <b>-Counseling/therapy . . .</b>                                    |                |         |         |
| I would be able to talk about what bothers me in counseling/therapy | 2.94 $\pm$ .72 | 1       | 4       |
| Is a waste of people's time (R)                                     | 3.17 $\pm$ .59 | 1       | 4       |
| Often harms people's relationships (R)                              | 3.05 $\pm$ .62 | 1       | 4       |
| Can help people overcome stress                                     | 3.01 $\pm$ .60 | 1       | 4       |

**Notes:** All items used likert 4-point strongly agree-strongly disagree response options.

R= item scored in the reverse direction.

For negative illness identity, higher is more negative, for the

Treatment belief scales, higher is more favorable to that treatment modality.
